# Supplementary material
Source: PubMed Central journal article supplement (PMC5045741)
Supplement: NIHMS758692-supplement-Supp_Info.pdf [file NIHMS758692-supplement-Supp_Info.pdf]

**Supporting Material for:  
LORAKS Makes Better SENSE:  
Phase-Constrained Partial Fourier SENSE  
Reconstruction without Phase Calibration**

Tae Hyung Kim, Kawin Setsompop, Justin P. Haldar

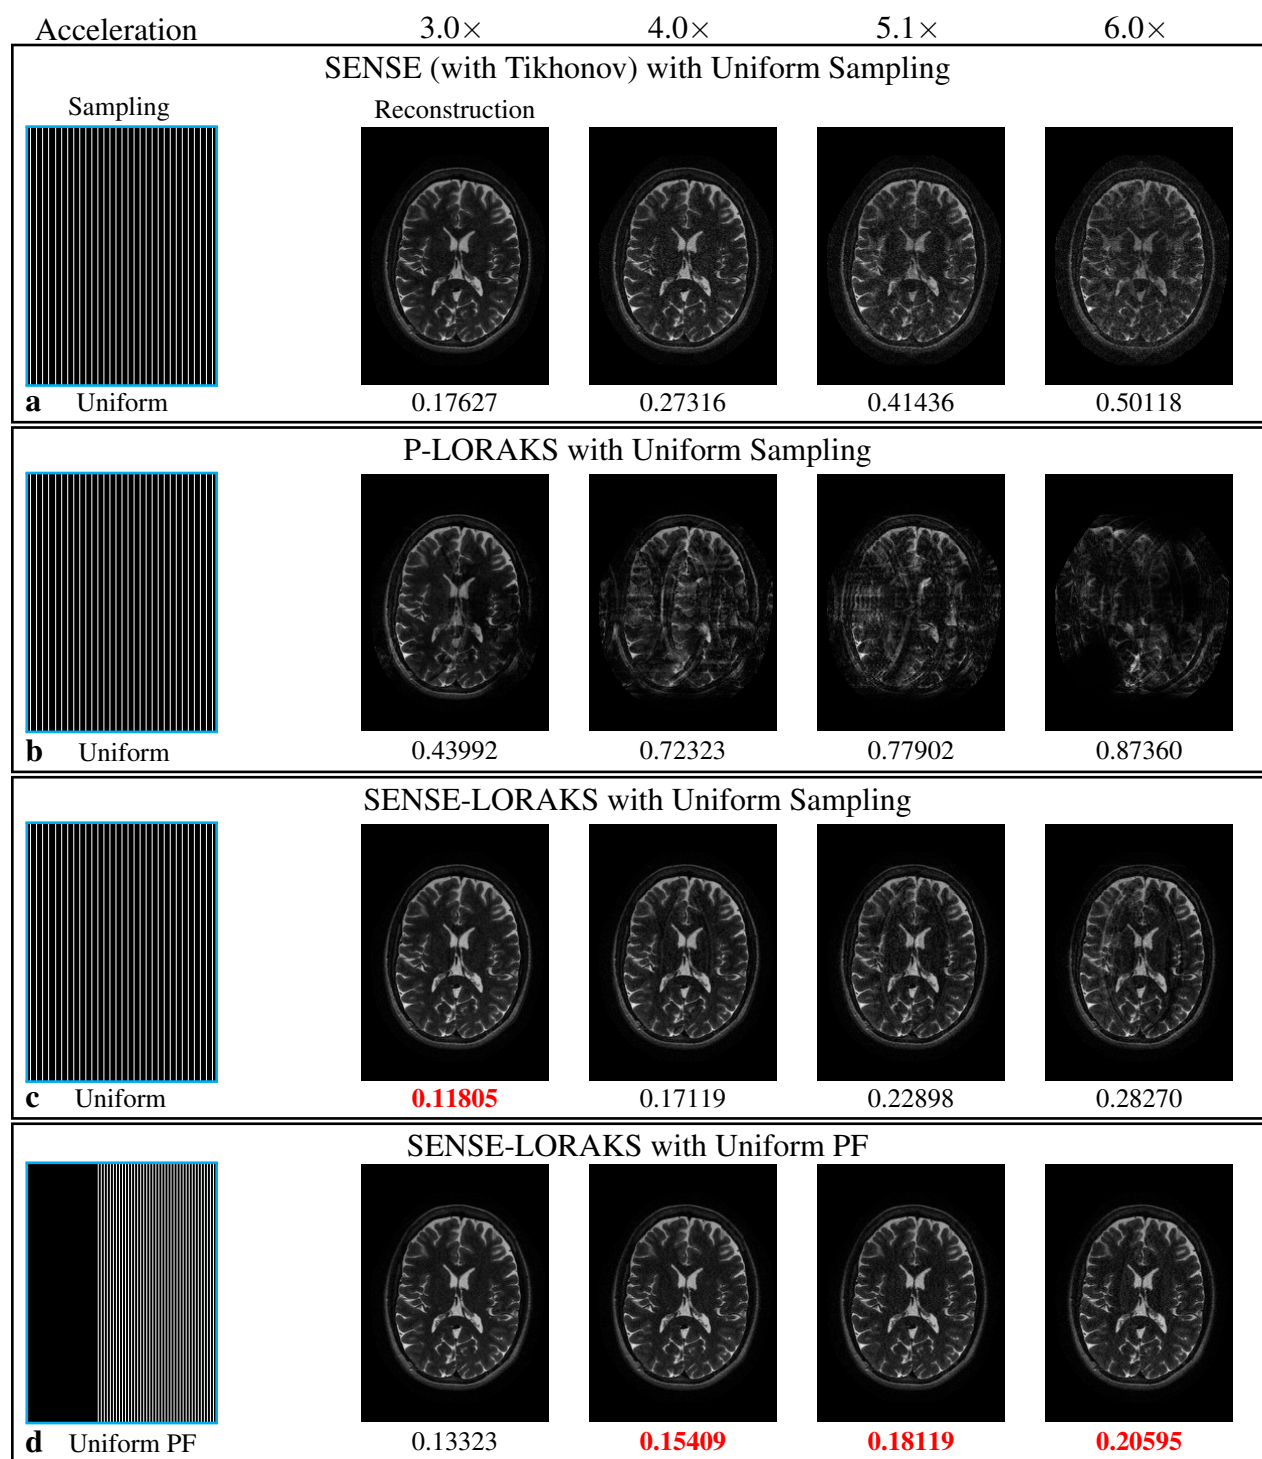

Figure S1: Reconstructed TSE images for a range of acceleration factors, presenting a detailed view of the results summarized in Figs. 2 and 4(a). Comparison between (a) SENSE with conventional Uniform sampling, (b) P-LORAKS with conventional Uniform sampling, (c) SENSE-LORAKS with conventional Uniform sampling, and (d) SENSE-LORAKS with Uniform PF sampling. Reconstructed images are shown using a linear grayscale (normalized so that image intensities are in the range from 0 to 1). NRMSE values are shown underneath each reconstruction, with the best NRMSE values highlighted with red. Corresponding error images are shown in Supporting Fig. S2.

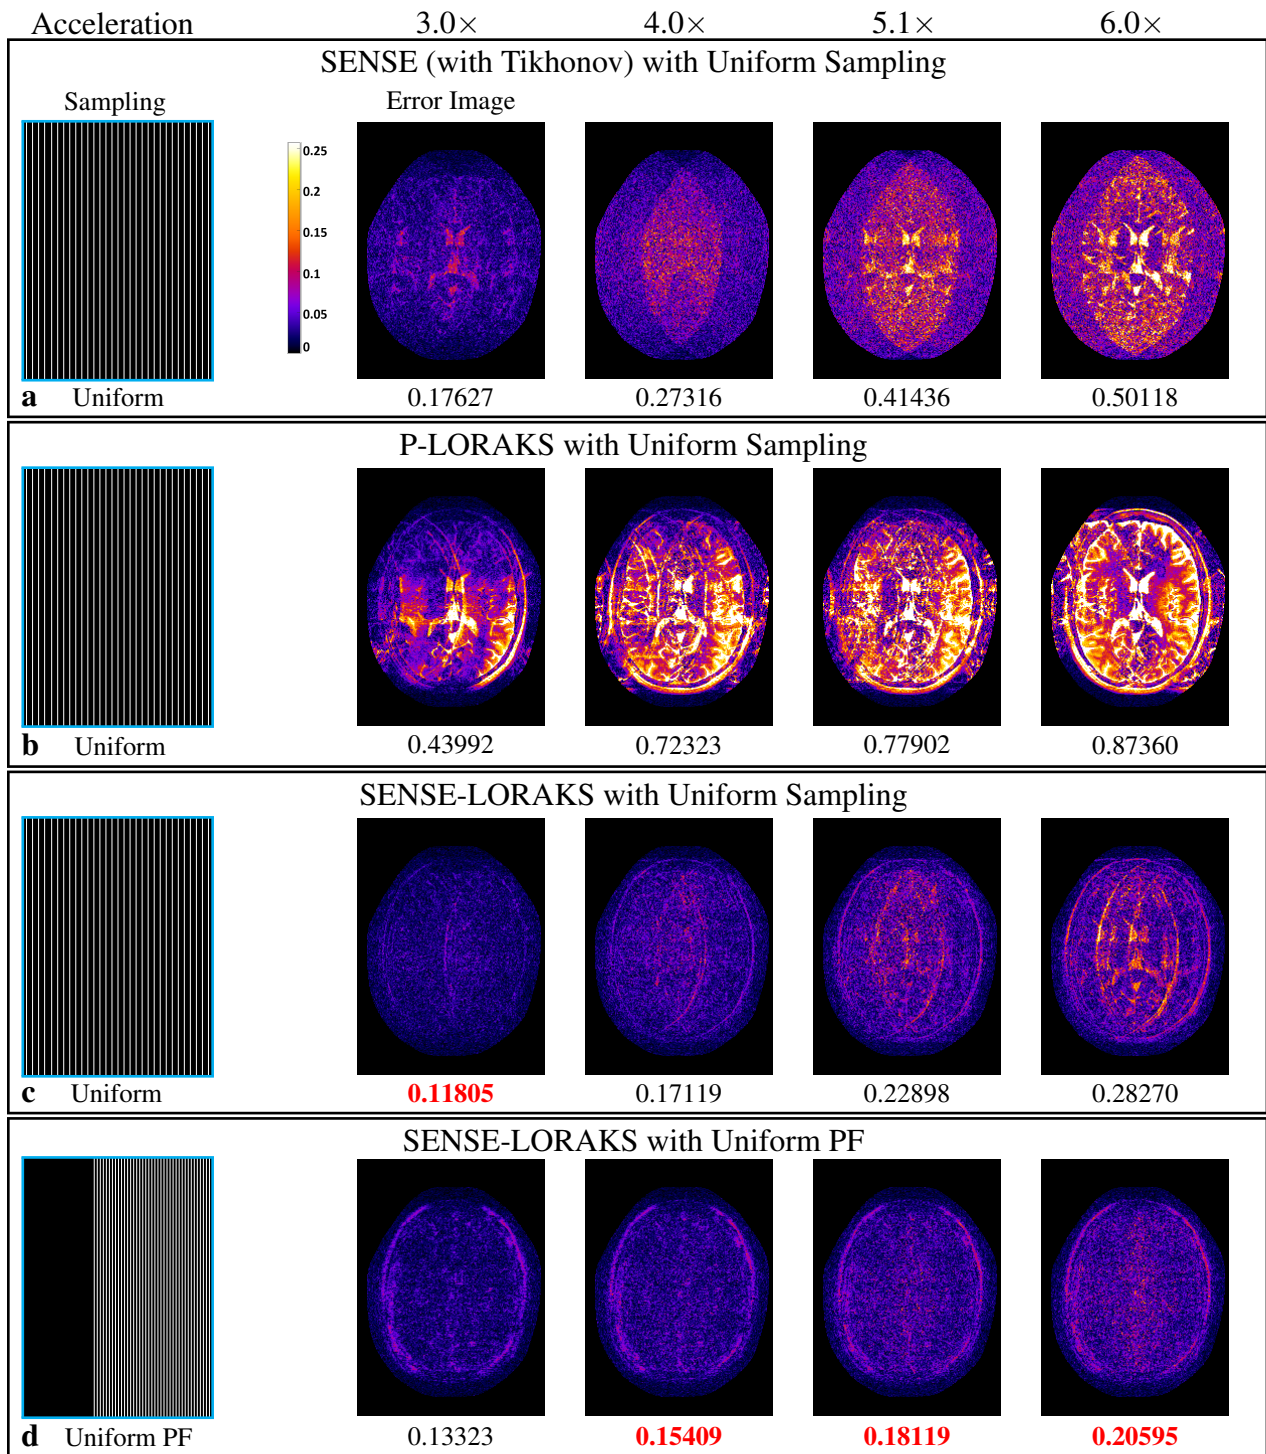

Figure S2: Error images corresponding to Supporting Fig. S1. Error images are shown using the indicated colorscale (which ranges from 0 to 0.25 to highlight small errors). NRMSE values are shown underneath each image where the smallest NRMSE values for a given acceleration rate are indicated in red.

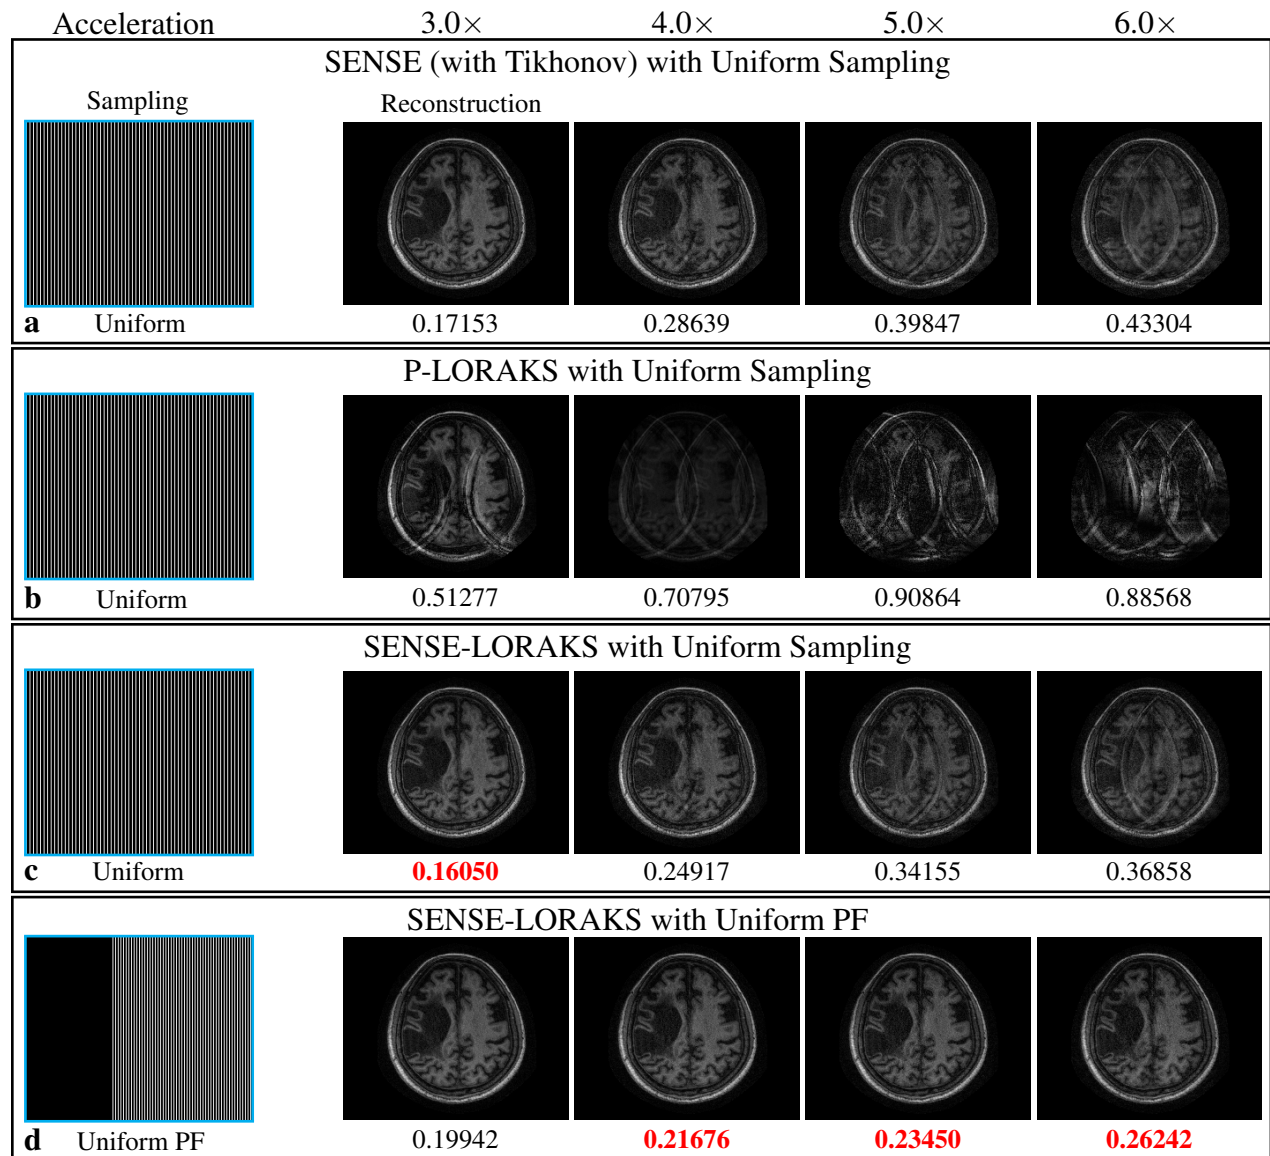

Figure S3: Reconstructed MPRAGE images for a range of acceleration factors, presenting a detailed view of the results summarized in Figs. 3 and 4(b). Comparison between (a) SENSE with conventional Uniform sampling, (b) P-LORAKS with conventional Uniform sampling, (c) SENSE-LORAKS with conventional Uniform sampling, and (d) SENSE-LORAKS with Uniform PF sampling. Reconstructed images are shown using a linear grayscale (normalized so that image intensities are in the range from 0 to 1). NRMSE values are shown underneath each reconstruction, with the best NRMSE values highlighted with red. Corresponding error images are shown in Supporting Fig. S4.

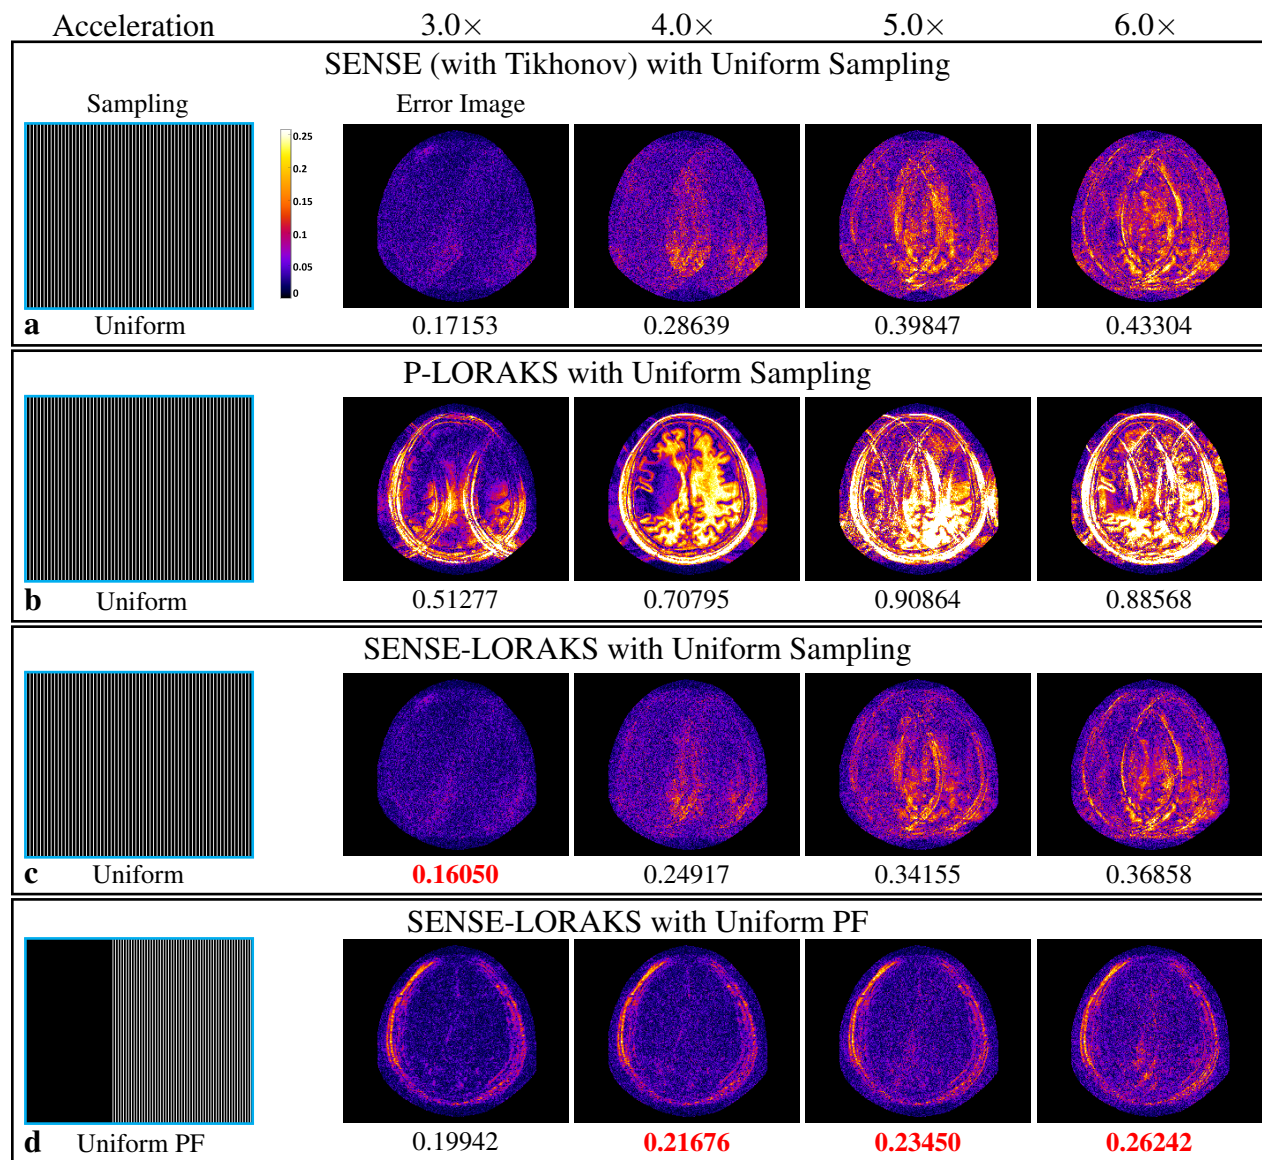

Figure S4: Error images corresponding to Supporting Fig. S3. Error images are shown using the indicated colorscale (which ranges from 0 to 0.25 to highlight small errors). NRMSE values are shown underneath each image where the smallest NRMSE values for a given acceleration rate are indicated in red.

| Sampling                                                                                       | Method                  | 3.0×                                                                                | 4.0×                                                                                | 5.1×                                                                                 | 6.0×                                                                                  |
|------------------------------------------------------------------------------------------------|-------------------------|-------------------------------------------------------------------------------------|-------------------------------------------------------------------------------------|--------------------------------------------------------------------------------------|---------------------------------------------------------------------------------------|
| 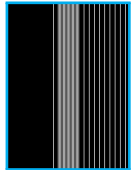<br>AC PF     | Phase-Constrained SENSE |    |    |    |    |
|                                                                                                |                         | 0.14080                                                                             | 0.16475                                                                             | 0.20515                                                                              | 0.25058                                                                               |
| <b>a</b>                                                                                       | SENSE-LORAKS            |    |    |    |    |
|                                                                                                |                         | <b>0.13456</b>                                                                      | <b>0.15629</b>                                                                      | <b>0.19710</b>                                                                       | <b>0.22584</b>                                                                        |
| <br>Random PF | P-LORAKS                |    |    |    |    |
|                                                                                                |                         | 0.14229                                                                             | 0.17652                                                                             | 0.21510                                                                              | 0.45342                                                                               |
| <b>b</b>                                                                                       | SENSE-LORAKS            |    |    |    |    |
|                                                                                                |                         | <b>0.13801</b>                                                                      | <b>0.16158</b>                                                                      | <b>0.19122</b>                                                                       | <b>0.20879</b>                                                                        |
| <br>Uniform | SENSE+TV                |  |  |  |  |
|                                                                                                |                         | <b>0.10677</b>                                                                      | 0.19796                                                                             | 0.31753                                                                              | 0.41822                                                                               |
| <b>c</b>                                                                                       | SENSE-LORAKS            |  |  |  |  |
|                                                                                                |                         | 0.11805                                                                             | <b>0.17119</b>                                                                      | <b>0.22898</b>                                                                       | <b>0.28270</b>                                                                        |
| <b>d</b>                                                                                       | SENSE-LORAKS            |  |  |  |  |
|                                                                                                |                         | 0.13323                                                                             | <b>0.15409</b>                                                                      | <b>0.18119</b>                                                                       | <b>0.20595</b>                                                                        |

Figure S5: Reconstructed TSE images for a range of acceleration factors, presenting a detailed view of the results summarized in Figs. 5 and 7(a). Comparison of images reconstructed using SENSE-LORAKS against (a) phase-constrained SENSE with AC PF sampling, (b) P-LORAKS with Random PF sampling, (c) SENSE+TV with conventional Uniform sampling. Reconstructions obtained using SENSE-LORAKS with Uniform PF sampling are shown in (d). Reconstructed images are shown using a linear grayscale (normalized so that image intensities are in the range from 0 to 1). NRMSE values are shown underneath each reconstruction, with the best NRMSE values highlighted with red. Corresponding error images are shown in Supporting Fig. S6.

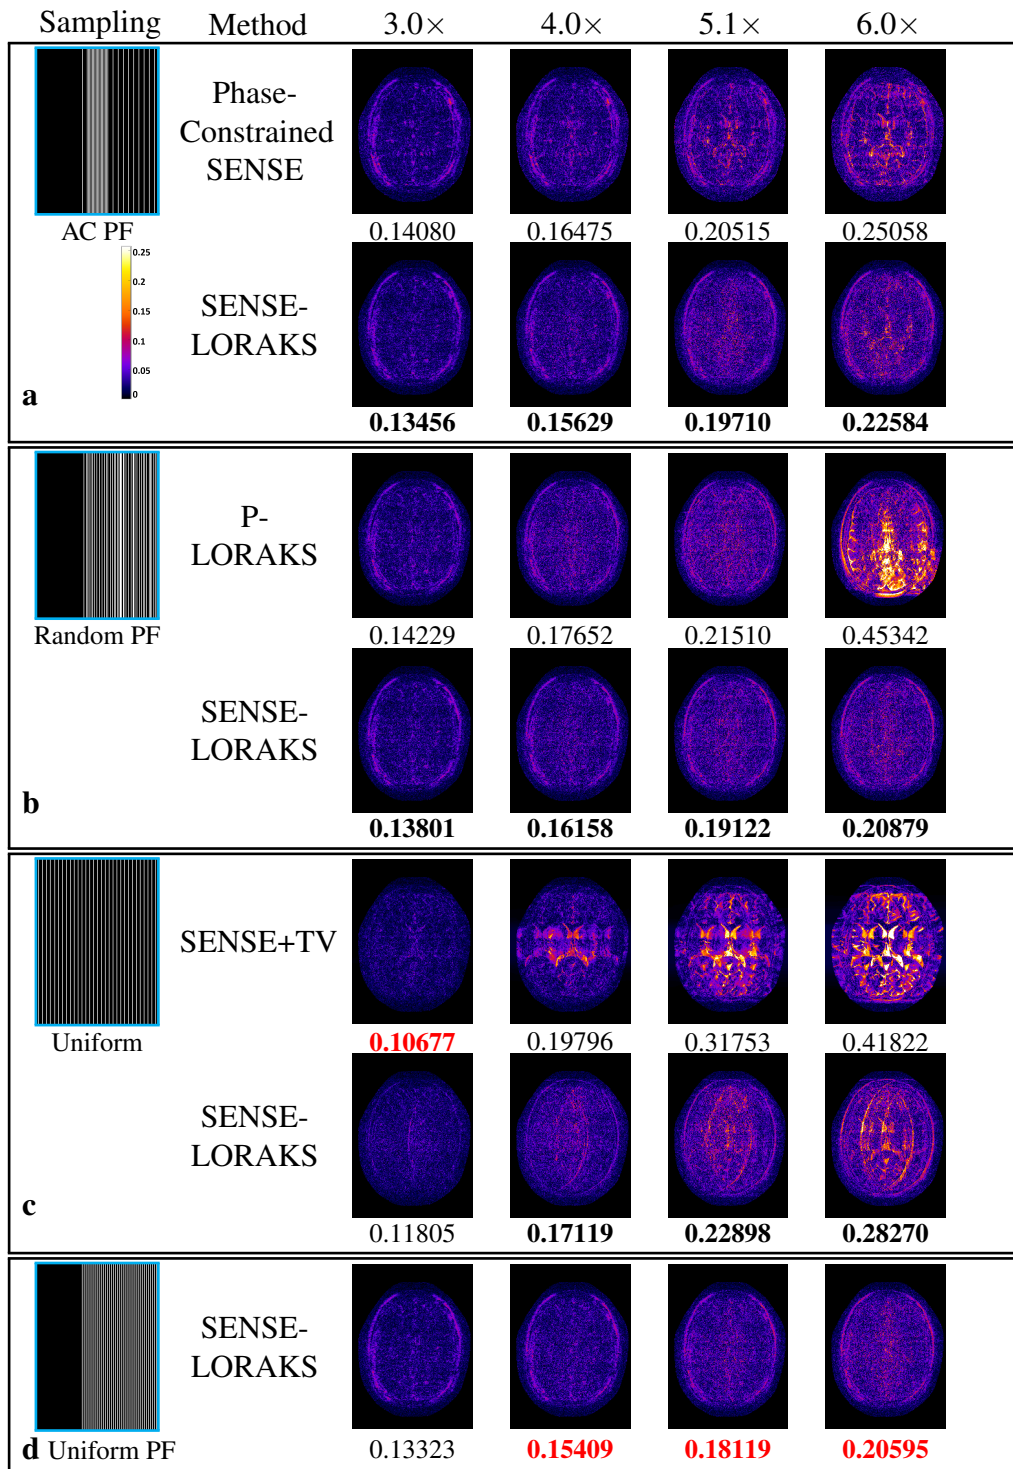

Figure S6: Error images corresponding to Supporting Fig. S6. Error images are shown using the indicated colorscale (which ranges from 0 to 0.25 to highlight small errors). NRMSE values are shown underneath each image where the smallest NRMSE values for a given acceleration rate are indicated in red.

| Sampling                                                                                          | Method                  | 3.0×                                                                                | 4.0×                                                                                 | 5.0×                                                                                  | 6.0×                                                                                  |
|---------------------------------------------------------------------------------------------------|-------------------------|-------------------------------------------------------------------------------------|--------------------------------------------------------------------------------------|---------------------------------------------------------------------------------------|---------------------------------------------------------------------------------------|
| 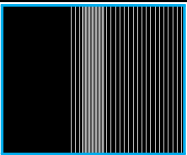<br>AC PF        | Phase-Constrained SENSE |    |    |    |    |
|                                                                                                   |                         | 0.20709                                                                             | 0.22236                                                                              | 0.24953                                                                               | 0.27789                                                                               |
| <b>a</b>                                                                                          | SENSE-LORAKS            |    |    |    |    |
|                                                                                                   |                         | <b>0.19786</b>                                                                      | <b>0.21290</b>                                                                       | <b>0.23678</b>                                                                        | <b>0.25735</b>                                                                        |
| <br>Random PF    | P-LORAKS                |    |    |    |    |
|                                                                                                   |                         | 0.24522                                                                             | 0.28050                                                                              | 0.77941                                                                               | 0.44090                                                                               |
| <b>b</b>                                                                                          | SENSE-LORAKS            |    |    |    |    |
|                                                                                                   |                         | <b>0.20687</b>                                                                      | <b>0.21947</b>                                                                       | <b>0.32671</b>                                                                        | <b>0.26902</b>                                                                        |
| <br>Uniform     | SENSE+TV                |   |   |   |   |
|                                                                                                   |                         | <b>0.13302</b>                                                                      | <b>0.20672</b>                                                                       | <b>0.33305</b>                                                                        | <b>0.36746</b>                                                                        |
| <b>c</b>                                                                                          | SENSE-LORAKS            |  |  |  |  |
|                                                                                                   |                         | 0.16050                                                                             | 0.24917                                                                              | 0.34155                                                                               | 0.36858                                                                               |
| <br>Uniform PF | SENSE-LORAKS            |  |  |  |  |
|                                                                                                   |                         | 0.19942                                                                             | 0.21676                                                                              | <b>0.23450</b>                                                                        | 0.26242                                                                               |
| <b>d</b>                                                                                          |                         |                                                                                     |                                                                                      |                                                                                       |                                                                                       |

Figure S7: Reconstructed MPRAGE images for a range of acceleration factors, presenting a detailed view of the results summarized in Figs. 6 and 7(b). Comparison of images reconstructed using SENSE-LORAKS against (a) phase-constrained SENSE with AC PF sampling, (b) P-LORAKS with Random PF sampling, (c) SENSE+TV with conventional Uniform sampling. Reconstructions obtained using SENSE-LORAKS with Uniform PF sampling are shown in (d). Reconstructed images are shown using a linear grayscale (normalized so that image intensities are in the range from 0 to 1). NRMSE values are shown underneath each reconstruction, with the best NRMSE values highlighted with red. Corresponding error images are shown in Supporting Fig. S8.



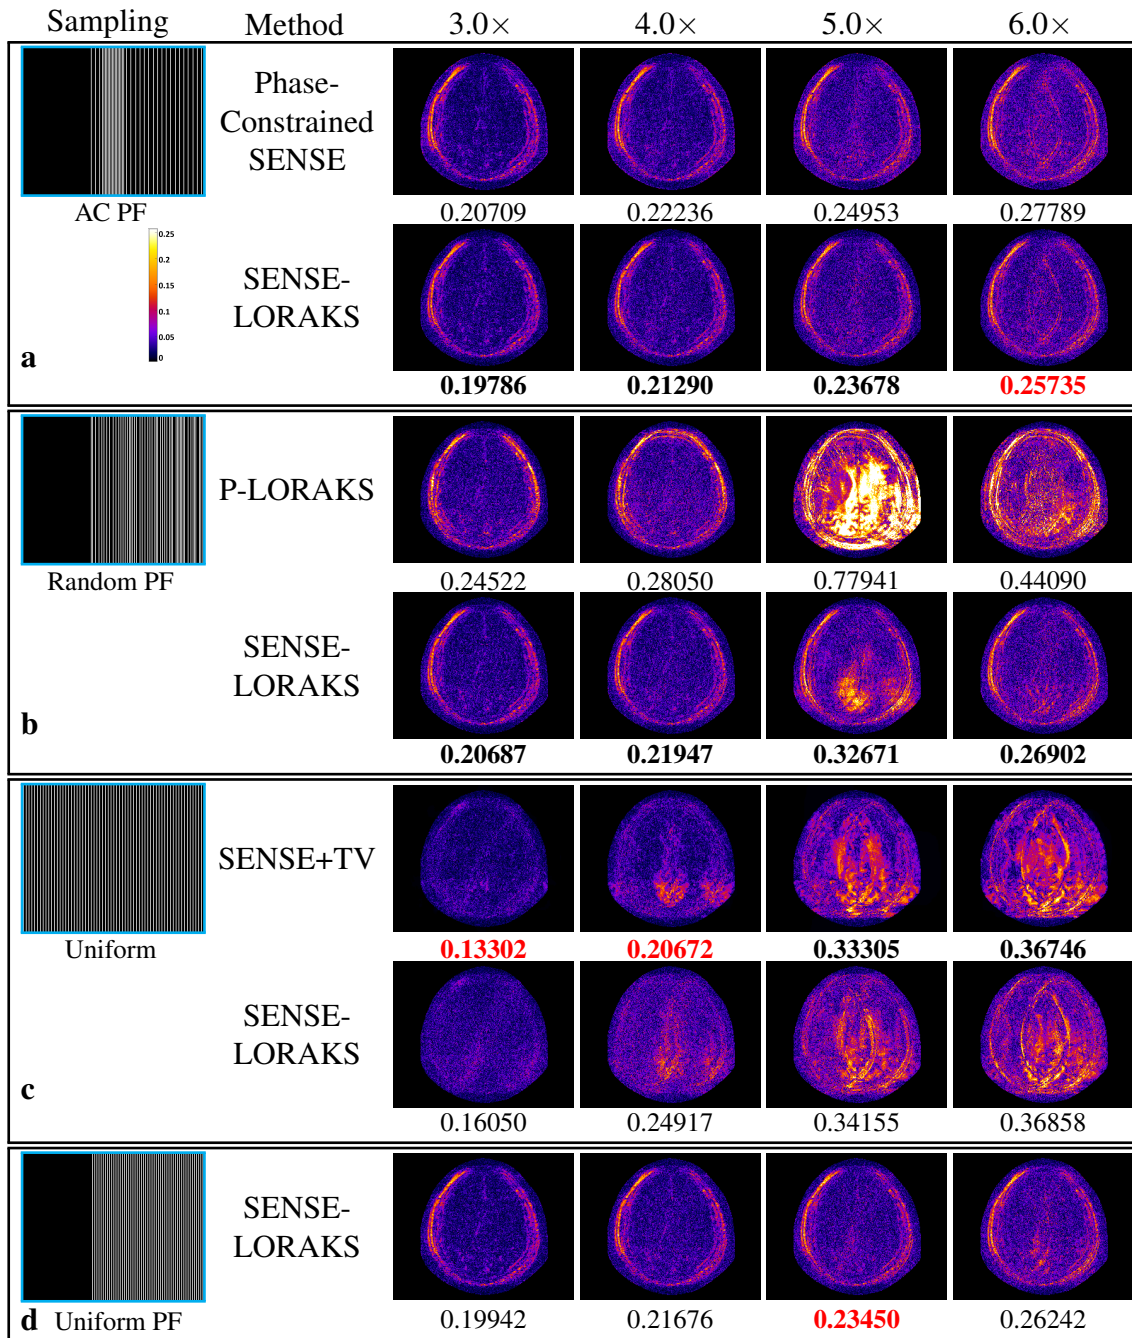

Figure S8: Error images corresponding to Supporting Fig. S7. Error images are shown using the indicated colorscale (which ranges from 0 to 0.25 to highlight small errors). NRMSE values are shown underneath each image where the smallest NRMSE values for a given acceleration rate are indicated in red.

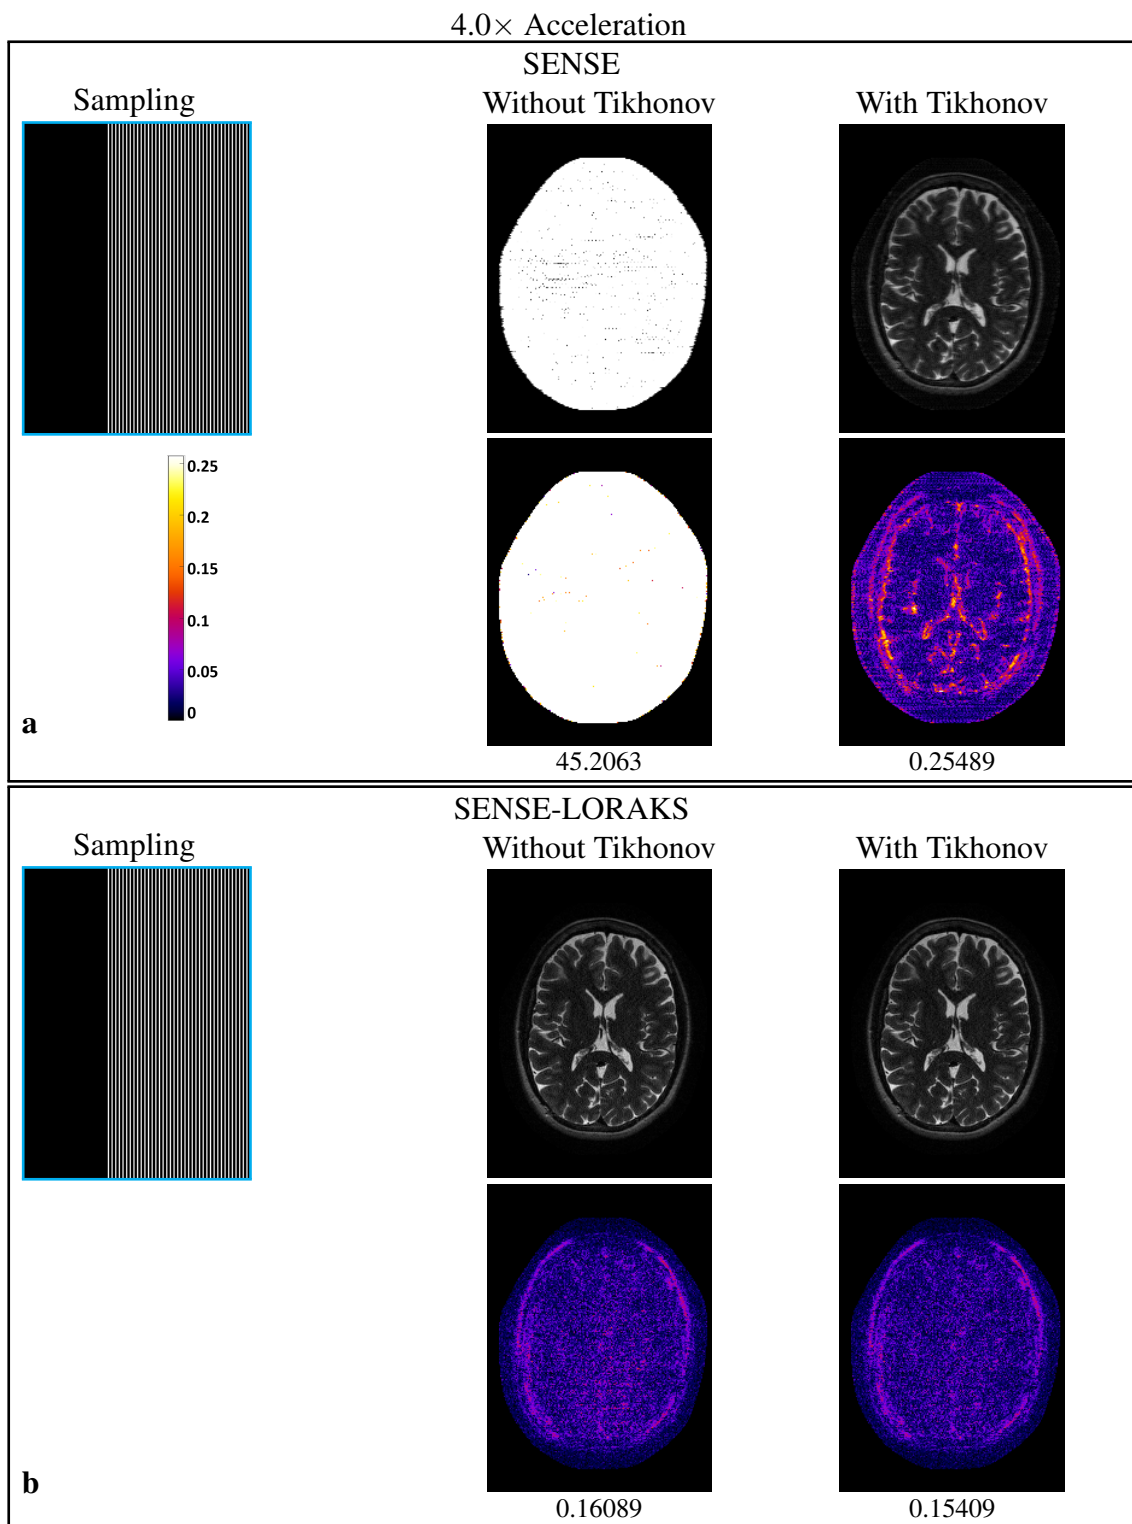

Figure S9: Illustration of the effects of Tikhonov regularization on (a) SENSE and (b) SENSE-LORAKS.

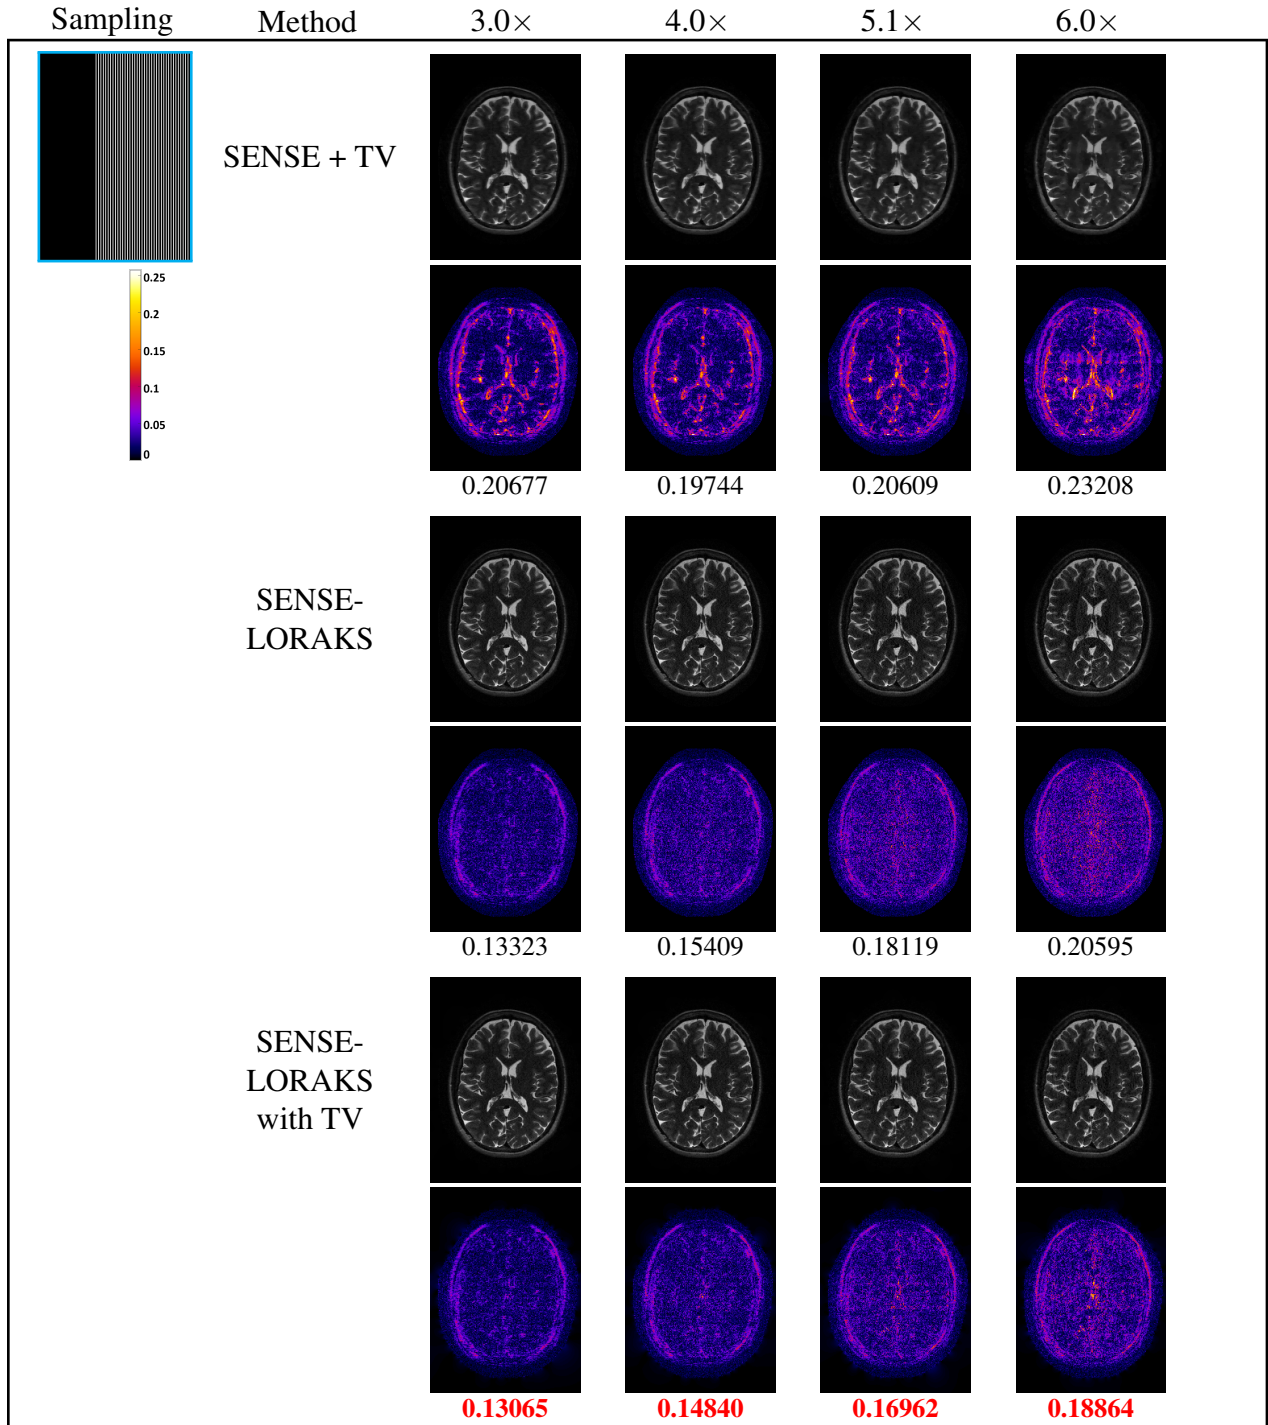

Figure S10: Comparison between SENSE+TV, SENSE-LORAKS, and SENSE-LORAKS with TV for TSE data with Uniform PF sampling. A subset of these results was shown in Fig. 10. The top rows show reconstructed images using a linear grayscale (normalized so that image intensities are in the range from 0 to 1), while the bottom rows show error images using the indicated colorscale (which ranges from 0 to 0.25 to highlight small errors). NRMSE values are shown underneath each reconstruction, with the best NRMSE values highlighted in red.
